# Supplementary material for: SOX-5 activates a novel RORγt enhancer to facilitate experimental autoimmune encephalomyelitis by promoting Th17 cell differentiation
Source: PubMed Central journal article supplement (PMC7817841; doi:10.1038/s41467-020-20786-w), 2021-01-20
Supplement: 41467_2020_20786_MOESM3_ESM.pdf [file 41467_2020_20786_MOESM3_ESM.pdf]

## Reporting Summary

Nature Research wishes to improve the reproducibility of the work that we publish. This form provides structure for consistency and transparency in reporting. For further information on Nature Research policies, see [Authors & Referees](#) and the [Editorial Policy Checklist](#).

### Statistics

For all statistical analyses, confirm that the following items are present in the figure legend, table legend, main text, or Methods section.

n/a Confirmed

- The exact sample size ( $n$ ) for each experimental group/condition, given as a discrete number and unit of measurement
- A statement on whether measurements were taken from distinct samples or whether the same sample was measured repeatedly
- The statistical test(s) used AND whether they are one- or two-sided  
*Only common tests should be described solely by name; describe more complex techniques in the Methods section.*
- A description of all covariates tested
- A description of any assumptions or corrections, such as tests of normality and adjustment for multiple comparisons
- A full description of the statistical parameters including central tendency (e.g. means) or other basic estimates (e.g. regression coefficient) AND variation (e.g. standard deviation) or associated estimates of uncertainty (e.g. confidence intervals)
- For null hypothesis testing, the test statistic (e.g.  $F$ ,  $t$ ,  $r$ ) with confidence intervals, effect sizes, degrees of freedom and  $P$  value noted  
*Give  $P$  values as exact values whenever suitable.*
- For Bayesian analysis, information on the choice of priors and Markov chain Monte Carlo settings
- For hierarchical and complex designs, identification of the appropriate level for tests and full reporting of outcomes
- Estimates of effect sizes (e.g. Cohen's  $d$ , Pearson's  $r$ ), indicating how they were calculated

*Our web collection on [statistics for biologists](#) contains articles on many of the points above.*

### Software and code

Policy information about [availability of computer code](#)

Data collection

Data collection of flow cytometry experiments was performed on BD FACS Canto II (BD,USA) and BD FACS ARIA II (BD,USA) instruments. Data collection of qPCR experiments was performed on BIO-RAD C1000 Touch (BIO-RAD,USA) and CFX96TM Real-Time System (BIO-RAD,USA). Images of tissue section staining experiments were performed on M8 Digital scanning microimaging system (Precipoint, Germany). Images of WB were performed on Fusion solo-s (Vilber, France). Data collection of dual-luciferase experiments were performed on GloMax Multi Jr(Promega, USA).

Data analysis

FlowJo (10.0.7) was used for flow cytometry data analysis. The bowtie (2.3.5), SICER and IGV (2.8.13) were used for ChIP-seq data analysis. Viewpoint (1) was used for images analysis of tissue section staining experiments. For additional details please refer to Methods section. GraphPad Prism (8) was used for the statistical test.

For manuscripts utilizing custom algorithms or software that are central to the research but not yet described in published literature, software must be made available to editors/reviewers. We strongly encourage code deposition in a community repository (e.g. GitHub). See the Nature Research [guidelines for submitting code & software](#) for further information.

### Data

Policy information about [availability of data](#)

All manuscripts must include a [data availability statement](#). This statement should provide the following information, where applicable:

- Accession codes, unique identifiers, or web links for publicly available datasets
- A list of figures that have associated raw data
- A description of any restrictions on data availability

We downloaded the mouse H3K4me2 ChIP-seq data, including GSM1032374, 1032375, 2258669, 2258675 and 2258681, from the GEO database. We also used the Roadmap Epigenomics Project database ([http://egg2.wustl.edu/roadmap/web\\_portal/](http://egg2.wustl.edu/roadmap/web_portal/)) to analyze the chromatin signature of a region similar to mouse RORCE (indicated by the red box) including H3K27me3, H3K9me3, H3K27Ac, H3K36me3, H3K4me1 and H3K4me3 in human Th17 and Th0 cells. We also used the JASPAR database to predict the transcriptional factor binding sites in RORCE (<http://jaspar.genereg.net/>). All the other data supporting the findings of this study are

## Field-specific reporting

Please select the one below that is the best fit for your research. If you are not sure, read the appropriate sections before making your selection.

Life sciences  Behavioural & social sciences  Ecological, evolutionary & environmental sciences

For a reference copy of the document with all sections, see [nature.com/documents/nr-reporting-summary-flat.pdf](https://www.nature.com/documents/nr-reporting-summary-flat.pdf)

## Life sciences study design

All studies must disclose on these points even when the disclosure is negative.

|                 |                                                                                                                                                                                                                                                                                                                                                                                                                                                                                                                                                                                                                                                                                                                                                                                                                                                                                                                             |
|-----------------|-----------------------------------------------------------------------------------------------------------------------------------------------------------------------------------------------------------------------------------------------------------------------------------------------------------------------------------------------------------------------------------------------------------------------------------------------------------------------------------------------------------------------------------------------------------------------------------------------------------------------------------------------------------------------------------------------------------------------------------------------------------------------------------------------------------------------------------------------------------------------------------------------------------------------------|
| Sample size     | No statistical methods were used to predetermine sample size. The samples sizes were chosen based on previous studies with similar methodologies. The references of cellular experiments sample size are: Yahia-Cherbal H, et al. NFAT primes the human RORC locus for RORgammat expression in CD4(+) T cells. <i>Nat Commun</i> 10, 4698 (2019); Salem T, et al. Chromatin loop organization of the junb locus in mouse dendritic cells. <i>Nucleic Acids Res</i> 41, 8908-8925 (2013). The references of in vivo experiments are: Kim HS, et al. PTEN drives Th17 cell differentiation by preventing IL-2 production. <i>J Exp Med</i> 214, 3381-3398 (2017); Tanaka S, et al. Sox5 and c-Maf cooperatively induce Th17 cell differentiation via RORgammat induction as downstream targets of Stat3. <i>J Exp Med</i> 211, 1857-1874 (2014). Additional details for each figure panel are included in the figure legends. |
| Data exclusions | No data exclusion were performed.                                                                                                                                                                                                                                                                                                                                                                                                                                                                                                                                                                                                                                                                                                                                                                                                                                                                                           |
| Replication     | Experiments were replicated at least twice as described throughout the manuscript and in the Methods. Additional information of the each figure panel is included in the figure legend.                                                                                                                                                                                                                                                                                                                                                                                                                                                                                                                                                                                                                                                                                                                                     |
| Randomization   | We did not use any randomization. All mice of same background, similar age and sex were used in all experiments.                                                                                                                                                                                                                                                                                                                                                                                                                                                                                                                                                                                                                                                                                                                                                                                                            |
| Blinding        | The investigators were not blinded to the identities of the samples because treatments and data collection were performed by the same people. However, data analysis were processed by other authors who were blinded to the group allocation.                                                                                                                                                                                                                                                                                                                                                                                                                                                                                                                                                                                                                                                                              |

## Behavioural & social sciences study design

All studies must disclose on these points even when the disclosure is negative.

|                   |                                                                                                                                                                                                                                                                                                                                                                                                                                                                                        |
|-------------------|----------------------------------------------------------------------------------------------------------------------------------------------------------------------------------------------------------------------------------------------------------------------------------------------------------------------------------------------------------------------------------------------------------------------------------------------------------------------------------------|
| Study description | <i>Briefly describe the study type including whether data are quantitative, qualitative, or mixed-methods (e.g. qualitative cross-sectional, quantitative experimental, mixed-methods case study).</i>                                                                                                                                                                                                                                                                                 |
| Research sample   | <i>State the research sample (e.g. Harvard university undergraduates, villagers in rural India) and provide relevant demographic information (e.g. age, sex) and indicate whether the sample is representative. Provide a rationale for the study sample chosen. For studies involving existing datasets, please describe the dataset and source.</i>                                                                                                                                  |
| Sampling strategy | <i>Describe the sampling procedure (e.g. random, snowball, stratified, convenience). Describe the statistical methods that were used to predetermine sample size OR if no sample-size calculation was performed, describe how sample sizes were chosen and provide a rationale for why these sample sizes are sufficient. For qualitative data, please indicate whether data saturation was considered, and what criteria were used to decide that no further sampling was needed.</i> |
| Data collection   | <i>Provide details about the data collection procedure, including the instruments or devices used to record the data (e.g. pen and paper, computer, eye tracker, video or audio equipment) whether anyone was present besides the participant(s) and the researcher, and whether the researcher was blind to experimental condition and/or the study hypothesis during data collection.</i>                                                                                            |
| Timing            | <i>Indicate the start and stop dates of data collection. If there is a gap between collection periods, state the dates for each sample cohort.</i>                                                                                                                                                                                                                                                                                                                                     |
| Data exclusions   | <i>If no data were excluded from the analyses, state so OR if data were excluded, provide the exact number of exclusions and the rationale behind them, indicating whether exclusion criteria were pre-established.</i>                                                                                                                                                                                                                                                                |
| Non-participation | <i>State how many participants dropped out/declined participation and the reason(s) given OR provide response rate OR state that no participants dropped out/declined participation.</i>                                                                                                                                                                                                                                                                                               |
| Randomization     | <i>If participants were not allocated into experimental groups, state so OR describe how participants were allocated to groups, and if allocation was not random, describe how covariates were controlled.</i>                                                                                                                                                                                                                                                                         |

## Ecological, evolutionary & environmental sciences study design

All studies must disclose on these points even when the disclosure is negative.

|                                   |                                                                                                                                                                                                                                                                                                                                                                                                                                                         |
|-----------------------------------|---------------------------------------------------------------------------------------------------------------------------------------------------------------------------------------------------------------------------------------------------------------------------------------------------------------------------------------------------------------------------------------------------------------------------------------------------------|
| Study description                 | Briefly describe the study. For quantitative data include treatment factors and interactions, design structure (e.g. factorial, nested, hierarchical), nature and number of experimental units and replicates.                                                                                                                                                                                                                                          |
| Research sample                   | Describe the research sample (e.g. a group of tagged <i>Passer domesticus</i> , all <i>Stenocereus thurberi</i> within Organ Pipe Cactus National Monument), and provide a rationale for the sample choice. When relevant, describe the organism taxa, source, sex, age range and any manipulations. State what population the sample is meant to represent when applicable. For studies involving existing datasets, describe the data and its source. |
| Sampling strategy                 | Note the sampling procedure. Describe the statistical methods that were used to predetermine sample size OR if no sample-size calculation was performed, describe how sample sizes were chosen and provide a rationale for why these sample sizes are sufficient.                                                                                                                                                                                       |
| Data collection                   | Describe the data collection procedure, including who recorded the data and how.                                                                                                                                                                                                                                                                                                                                                                        |
| Timing and spatial scale          | Indicate the start and stop dates of data collection, noting the frequency and periodicity of sampling and providing a rationale for these choices. If there is a gap between collection periods, state the dates for each sample cohort. Specify the spatial scale from which the data are taken                                                                                                                                                       |
| Data exclusions                   | If no data were excluded from the analyses, state so OR if data were excluded, describe the exclusions and the rationale behind them, indicating whether exclusion criteria were pre-established.                                                                                                                                                                                                                                                       |
| Reproducibility                   | Describe the measures taken to verify the reproducibility of experimental findings. For each experiment, note whether any attempts to repeat the experiment failed OR state that all attempts to repeat the experiment were successful.                                                                                                                                                                                                                 |
| Randomization                     | Describe how samples/organisms/participants were allocated into groups. If allocation was not random, describe how covariates were controlled. If this is not relevant to your study, explain why.                                                                                                                                                                                                                                                      |
| Blinding                          | Describe the extent of blinding used during data acquisition and analysis. If blinding was not possible, describe why OR explain why blinding was not relevant to your study.                                                                                                                                                                                                                                                                           |
| Did the study involve field work? | <input type="checkbox"/> Yes <input type="checkbox"/> No                                                                                                                                                                                                                                                                                                                                                                                                |

### Field work, collection and transport

|                          |                                                                                                                                                                                                                                                                                                                                |
|--------------------------|--------------------------------------------------------------------------------------------------------------------------------------------------------------------------------------------------------------------------------------------------------------------------------------------------------------------------------|
| Field conditions         | Describe the study conditions for field work, providing relevant parameters (e.g. temperature, rainfall).                                                                                                                                                                                                                      |
| Location                 | State the location of the sampling or experiment, providing relevant parameters (e.g. latitude and longitude, elevation, water depth).                                                                                                                                                                                         |
| Access and import/export | Describe the efforts you have made to access habitats and to collect and import/export your samples in a responsible manner and in compliance with local, national and international laws, noting any permits that were obtained (give the name of the issuing authority, the date of issue, and any identifying information). |
| Disturbance              | Describe any disturbance caused by the study and how it was minimized.                                                                                                                                                                                                                                                         |

## Reporting for specific materials, systems and methods

We require information from authors about some types of materials, experimental systems and methods used in many studies. Here, indicate whether each material, system or method listed is relevant to your study. If you are not sure if a list item applies to your research, read the appropriate section before selecting a response.

### Materials & experimental systems

| n/a                                 | Included in the study                                           |
|-------------------------------------|-----------------------------------------------------------------|
| <input type="checkbox"/>            | <input checked="" type="checkbox"/> Antibodies                  |
| <input type="checkbox"/>            | <input checked="" type="checkbox"/> Eukaryotic cell lines       |
| <input checked="" type="checkbox"/> | <input type="checkbox"/> Palaeontology                          |
| <input type="checkbox"/>            | <input checked="" type="checkbox"/> Animals and other organisms |
| <input checked="" type="checkbox"/> | <input type="checkbox"/> Human research participants            |
| <input checked="" type="checkbox"/> | <input type="checkbox"/> Clinical data                          |

### Methods

| n/a                                 | Included in the study                              |
|-------------------------------------|----------------------------------------------------|
| <input checked="" type="checkbox"/> | <input type="checkbox"/> ChIP-seq                  |
| <input type="checkbox"/>            | <input checked="" type="checkbox"/> Flow cytometry |
| <input checked="" type="checkbox"/> | <input type="checkbox"/> MRI-based neuroimaging    |

## Antibodies

| Antibodies used | Antibody           | Supplier                  | Catalog number | Clone(species)                    | Dilution or Final concentration      |
|-----------------|--------------------|---------------------------|----------------|-----------------------------------|--------------------------------------|
|                 | Anti-CD3           | eBioscience               | 17-0031-63     | 145-2C11(Mouse, Human)            | 1:100 for flow cytometry             |
|                 | Anti-CD4           | eBioscience               | 45-0049-42     | RPA-T4(Mouse, Human)              | 1:100 for flow cytometry             |
|                 | Anti-CD8           | eBioscience               | 17-0081-82     | 53-6.7(Mouse)                     | 1:100 for flow cytometry             |
|                 | Anti-CD19          | eBioscience               | RM7705         | 6D5(Mouse)                        | 1:100 for flow cytometry             |
|                 | Anti-CD45          | eBioscience               | 45-0451-82     | 30-F11(Mouse, Human)              | 1:100 for flow cytometry             |
|                 | Anti-CD127         | eBioscience               | 48-1271-82     | A7R34(Mouse)                      | 1:100 for flow cytometry             |
|                 | Anti-Gr-1          | eBioscience               | 17-5931-82     | RB6-8C5(Mouse, Dog, Fish, Human)  | 1:100 for flow cytometry             |
|                 | Anti-RORyt         | eBioscience               | 17-6988-82     | AFKJS-9(Mouse, Human)             | 1:100 for flow cytometry             |
|                 | Anti-IL-17         | eBioscience               | 12-7177-81     | eBio17B7 (Human, Mouse, Rat)      | 1:100 for flow cytometry             |
|                 | Anti-TBX21         | eBioscience               | 17-5825-82     | eBio4B10(Mouse, Human)            | 1:100 for flow cytometry             |
|                 | Anti-IFN- $\gamma$ | eBioscience               | 12-7311-82     | XMG1.2(Mouse, Human)              | 1:100 for flow cytometry             |
|                 | Anti-GATA3         | eBioscience               | 50-9966-42     | TWAJ(Mouse, Human)                | 1:100 for flow cytometry             |
|                 | Anti-IL-4          | eBioscience               | 12-7041-82     | 11B11(Mouse, Rat)                 | 1:100 for flow cytometry             |
|                 | Anti-SOX-5         | Abcam                     | ab94396        | polyclone(Mouse, Human)           | 1:250 for ChIP or 1:1000 for WB      |
|                 | Anti-STAT3         | Cell Signaling Technology | 9139           | 124H6(Mouse, Human, Rat, Monkey ) | 1:250 for ChIP/IP or 1:1000 for WB   |
|                 | Anti-H3K4me1       | Abcam                     | ab176877       | ERP16597(Mouse, Rat, Human)       | 1:250 for ChIP                       |
|                 | Anti-H3K27ac       | Abcam                     | ab4729         | Polyclone(Mouse, Cow, Human)      | 1:250 for ChIP                       |
|                 | Anti-HA            | Abcam                     | ab18181        | HA.C5(all)                        | 1:250 for IP or 1:1000 for WB        |
|                 | Anti-Flag          | Sigma-Aldrich             | F3165          | M2(all)                           | 1:1000 for WB                        |
|                 | Anti-CD3           | BioXCell                  | BP0001-1       | 145-2C11(Mouse)                   | 2 $\mu$ g/ml for T cell stimulation  |
|                 | Anti-CD28          | BioXCell                  | BE0328         | D665(Mouse)                       | 2 $\mu$ g/ml for T cell stimulation  |
|                 | Anti-IL-4          | BioXCell                  | BP0045         | 11B11(Mouse)                      | 10 $\mu$ g/ml for T cell stimulation |
|                 | Anti-IFN $\gamma$  | BioXCell                  | BP0055         | XMG1.2(mouse)                     | 10 $\mu$ g/ml for T cell stimulation |

Validation

Antibodies were validated by the manufacturer and our experiments. Antibodies of anti-CD3, Anti-CD4, Anti-CD8, Anti-CD19, Anti-CD45, Anti-CD127, Anti-Gr-1, Anti-RORyt, Anti-IL-17, Anti-T-bet, Anti-IFN- $\gamma$ , Anti-GATA3 and Anti-IL-4 from eBioscience were validated for flow cytometry of detecting mouse species proteins. Antibodies of Anti-SOX-5, Anti-STAT3, Anti-HA and Anti-Flag were validated for western blot of detecting mouse species proteins. Antibodies of Anti-SOX-5, Anti-STAT3, Anti-H3K4me1 and Anti-H3K27ac were validated for ChIP experiments of detecting mouse species proteins. Antibodies of Anti-STAT3 and Anti-HA were validated for IP experiments of detecting mouse species proteins. Antibodies of Anti-CD3, Anti-CD28, Anti-IL-4 and Anti-IFN $\gamma$  from BioXCell were validated for mouse T cell activation.

## Eukaryotic cell lines

Policy information about [cell lines](#)

|                                                                   |                                                                                               |
|-------------------------------------------------------------------|-----------------------------------------------------------------------------------------------|
| Cell line source(s)                                               | EL4, 293T, HeLa and B16 cells were obtained from the American Type Culture Collection (ATCC). |
| Authentication                                                    | No further authentication was performed.                                                      |
| Mycoplasma contamination                                          | The EL4, 293T, HeLa and B16 cell lines were tested negative for mycoplasma contamination.     |
| Commonly misidentified lines (See <a href="#">ICLAC</a> register) | No commonly misidentified cell lines were used in the study                                   |

## Palaeontology

|                     |                                                                                                                                                                                                                                                                                      |
|---------------------|--------------------------------------------------------------------------------------------------------------------------------------------------------------------------------------------------------------------------------------------------------------------------------------|
| Specimen provenance | <i>Provide provenance information for specimens and describe permits that were obtained for the work (including the name of the issuing authority, the date of issue, and any identifying information).</i>                                                                          |
| Specimen deposition | <i>Indicate where the specimens have been deposited to permit free access by other researchers.</i>                                                                                                                                                                                  |
| Dating methods      | <i>If new dates are provided, describe how they were obtained (e.g. collection, storage, sample pretreatment and measurement), where they were obtained (i.e. lab name), the calibration program and the protocol for quality assurance OR state that no new dates are provided.</i> |

Tick this box to confirm that the raw and calibrated dates are available in the paper or in Supplementary Information.

## Animals and other organisms

Policy information about [studies involving animals](#); [ARRIVE guidelines](#) recommended for reporting animal research

|                    |                                                                                                                                                                                                                                                                                                                                                                                                                                                                                                                                                                                                                                              |
|--------------------|----------------------------------------------------------------------------------------------------------------------------------------------------------------------------------------------------------------------------------------------------------------------------------------------------------------------------------------------------------------------------------------------------------------------------------------------------------------------------------------------------------------------------------------------------------------------------------------------------------------------------------------------|
| Laboratory animals | C57BL/6 male and female mice were obtained from Beijing Biocytogen Co. RORCE2-deficient mice (C57BL/6 background) were generated by Beijing Biocytogen Co. The Sox5-BS-deficient mice (C57BL/6 background) were generated by Dr. Yiqiang Cui of Nanjing Medical University. All mice were housed in groups of 4-5 per cage in standard closed plastic cages containing bedding, enrichment, food, and water, at controlled stable room temperature and humidity, light/dark cycle 12 hours per day. All mice were maintained on a C57BL/6 background under specific pathogen-free conditions and bred in the animal facility of Institute of |
|--------------------|----------------------------------------------------------------------------------------------------------------------------------------------------------------------------------------------------------------------------------------------------------------------------------------------------------------------------------------------------------------------------------------------------------------------------------------------------------------------------------------------------------------------------------------------------------------------------------------------------------------------------------------------|

immunology of Third Military Medical University. 8~12 weeks old mice were used in this study.

Wild animals

No wild animals were used.

Field-collected samples

No field-collected samples were used.

Ethics oversight

All mouse experiments were performed in accordance with the guidelines of the Institutional Animal Care and Use Committees of the Third Military Medical University.

Note that full information on the approval of the study protocol must also be provided in the manuscript.

## Human research participants

Policy information about [studies involving human research participants](#)

Population characteristics

Describe the covariate-relevant population characteristics of the human research participants (e.g. age, gender, genotypic information, past and current diagnosis and treatment categories). If you filled out the behavioural & social sciences study design questions and have nothing to add here, write "See above."

Recruitment

Describe how participants were recruited. Outline any potential self-selection bias or other biases that may be present and how these are likely to impact results.

Ethics oversight

Identify the organization(s) that approved the study protocol.

Note that full information on the approval of the study protocol must also be provided in the manuscript.

## Clinical data

Policy information about [clinical studies](#)

All manuscripts should comply with the ICMJE [guidelines for publication of clinical research](#) and a completed [CONSORT checklist](#) must be included with all submissions.

Clinical trial registration

Provide the trial registration number from [ClinicalTrials.gov](#) or an equivalent agency.

Study protocol

Note where the full trial protocol can be accessed OR if not available, explain why.

Data collection

Describe the settings and locales of data collection, noting the time periods of recruitment and data collection.

Outcomes

Describe how you pre-defined primary and secondary outcome measures and how you assessed these measures.

## ChIP-seq

### Data deposition

Confirm that both raw and final processed data have been deposited in a public database such as [GEO](#).

Confirm that you have deposited or provided access to graph files (e.g. BED files) for the called peaks.

Data access links

May remain private before publication.

For "Initial submission" or "Revised version" documents, provide reviewer access links. For your "Final submission" document, provide a link to the deposited data.

Files in database submission

Provide a list of all files available in the database submission.

Genome browser session

(e.g. [UCSC](#))

Provide a link to an anonymized genome browser session for "Initial submission" and "Revised version" documents only, to enable peer review. Write "no longer applicable" for "Final submission" documents.

### Methodology

Replicates

Describe the experimental replicates, specifying number, type and replicate agreement.

Sequencing depth

Describe the sequencing depth for each experiment, providing the total number of reads, uniquely mapped reads, length of reads and whether they were paired- or single-end.

Antibodies

Describe the antibodies used for the ChIP-seq experiments; as applicable, provide supplier name, catalog number, clone name, and lot number.

Peak calling parameters

Specify the command line program and parameters used for read mapping and peak calling, including the ChIP, control and index files used.

Data quality

Describe the methods used to ensure data quality in full detail, including how many peaks are at FDR 5% and above 5-fold enrichment.



## Flow Cytometry

### Plots

Confirm that:

- The axis labels state the marker and fluorochrome used (e.g. CD4-FITC).
- The axis scales are clearly visible. Include numbers along axes only for bottom left plot of group (a 'group' is an analysis of identical markers).
- All plots are contour plots with outliers or pseudocolor plots.
- A numerical value for number of cells or percentage (with statistics) is provided.

### Methodology

#### Sample preparation

(1) The isolation and analysis of splenic CD4<sup>+</sup> T cells: To prepare single-cell suspensions, the spleens of mice were mechanically dissociated and passed through 70- $\mu$ m mesh (BD Biosciences). CD4<sup>+</sup> T cells were purified using an EasySep™ mouse CD4<sup>+</sup> T cell isolation kit according to the manufacturer's instructions (STEMCELL Technologies). The purified cells were then stimulated with PMA (50 ng/ml, Sigma-Aldrich), ionomycin (1  $\mu$ M, Calbiochem) for 2 hours. Then, we add the protein transport inhibitor Golgi-Stop (BD Bioscience) at a final concentration of 3  $\mu$ M in the last 2 hours of stimulation and then stained with anti-CD4, anti-IFN- $\gamma$ , anti-IL4, anti-IL17A, anti-TBX21, anti-GATA3 and anti-ROR $\gamma$ t antibodies for flow cytometry analysis (all antibodies were purchased from eBioscience).

(2) Sorting CD4<sup>+</sup>IL17<sup>+</sup> Th17 cells and CD4<sup>+</sup>IL17<sup>-</sup> T cells: To prepare single-cell suspensions, the spleen and mesenteric lymph nodes of IL17-IRES-EGFP mice (purchased from Beijing Biocytogen Co., Ltd) were mechanically dissociated and passed through 70- $\mu$ m mesh (BD Biosciences). CD4<sup>+</sup> T cells were purified using an EasySep™ mouse CD4<sup>+</sup> T cell isolation kit according to the manufacturer's instructions (STEMCELL Technologies) and then incubated for 30 min at room temperature with an anti-mCD4 antibody (PerCP-Cy5.5A). Subsequently, the CD4<sup>+</sup> T cells were sorted into CD4<sup>+</sup>IL17<sup>+</sup> Th17 cells (from an IL17-EGFP mouse) and CD4<sup>+</sup>IL17<sup>-</sup> T cells based on CD4 and GFP expression analyzed by FACS, and the sorting purity was retested with anti-CD4 and anti-ROR $\gamma$ t monoclonal antibodies (mAbs). All antibodies were purchased from eBioscience.

(3) Differentiation of CD4<sup>+</sup> T cells in vitro: Naïve CD4<sup>+</sup> T cells were isolated from 8- to 12-week-old mice with an EasySep™ mouse naïve CD4<sup>+</sup> T cell isolation kit (STEMCELL) according to the manufacturer's instructions. Sorted naïve CD4<sup>+</sup> T cells were cultured on irradiated splenocytes (2000 rads) with soluble anti-CD3 (2  $\mu$ g/ml, 145-2C11; BioXCell) at a ratio of 1:5 in a 24-well. The naïve cells were cultured at  $1.5 \times 10^6$ /ml in T cell medium, sodium pyruvate, Hepes, penicillin/streptomycin, gentamicin sulfate, and 2-mercaptoethanol. The following cytokines were added to generate Th17 subset: IL-6 (20 ng/ml; Miltenyi Biotec), TGF- $\beta$ 1 (2 ng/ml; Miltenyi Biotec), anti-IL-4 (10  $\mu$ g/ml; 11B11; BioXCell) and anti-IFN $\gamma$  (10  $\mu$ g/ml; XMG1.2; BioXCell). On day 3 after stimulation, we transferred 4 24-wells into 1 10 cm-dish containing 10 ml of T cell medium, IL-6 (20 ng/ml; Miltenyi Biotec), TGF- $\beta$ 1 (2 ng/ml; Miltenyi Biotec), anti-IL-4 (10  $\mu$ g/ml; 11B11; BioXCell) and anti-IFN $\gamma$  (10  $\mu$ g/ml; XMG1.2; BioXCell). This time we supplemented IL-2 (15 U/ml) into the T cell media and cultured the cells for additional 2 days before analysis. Th1 and Th2 polarizations were performed using CellXVivo mouse Th1 cell differentiation kit (R&D Systems, CDK018) and CellXVivo mouse Th2 cell differentiation kit (R&D Systems, CDK019), respectively. The polarized cells were then stimulated with PMA (50 ng/ml, Sigma-Aldrich), ionomycin (1  $\mu$ M, Calbiochem) for 2 hours. Then, we add the protein transport inhibitor Golgi-Stop (BD Bioscience) at a final concentration of 3  $\mu$ M in the last 2 hours of stimulation and then stained with anti-CD4, anti-IFN- $\gamma$ , anti-IL4, anti-IL17 and anti-ROR $\gamma$ t antibodies for flow cytometry analysis (all antibodies were purchased from eBioscience).

(4) Isolation and analysis of spinal cord mononuclear cells: Mice were anesthetized and perfused with cold PBS. The spinal cord was then removed, cut into 0.5-cm pieces, digested with the Neural Tissue Dissociation Kit (Miltenyi Biotec), and homogenized. The mononuclear cells in the spinal cord were isolated by gradient centrifugation at 850 g for 30 min on a 40%/80% Percoll gradient. The isolated cells were then stimulated with PMA (50 ng/ml, Sigma-Aldrich), ionomycin (1  $\mu$ M, Calbiochem) for 2 hours. Then, we add the protein transport inhibitor Golgi-Stop (BD Bioscience) at a final concentration of 3  $\mu$ M in the last 2 hours of stimulation and then stained with anti-CD45, anti-CD3, anti-IFN- $\gamma$ , anti-CD4, anti-IL4, anti-IL17 and anti-ROR $\gamma$ t antibodies for flow cytometry analysis (all antibodies were purchased from eBioscience).

(5) Isolation and analysis of lamina propria lymphocytes: The pieces of tissue were digested for 1 h at 37°C in a digestion solution containing 4% FBS, 0.5 mg/ml collagenase III (Roche), 0.2 mg/ml DNase I (Sigma-Aldrich), and 2 mg/ml dispase II (Sigma-Aldrich) after removing the epithelial cell layer, and lymphocytes were obtained by gradient centrifugation on a 40%/80% Percoll gradient (GE Healthcare). For flow cytometry analysis, isolated lymphocytes were stained with an anti-lineage cocktail (including anti-CD19, anti-CD8, anti-Gr1, and anti-CD3 antibodies) and anti-CD45, anti-CD127, anti-CD4, anti-IL17 and anti-ROR $\gamma$ t antibodies (all antibodies were purchased from eBioscience).

For surface staining of all the flow cytometry, cells were stained with the appropriate antibodies for 30 min at 4°C. For intracellular staining, cells were fixed and permeabilized with Perm/Fix (eBioscience), washed two times with Perm/Wash (eBioscience) and then stained with appropriate antibodies for 30 min in PBS containing 2% FBS.

#### Instrument

BD FACSCanto II, BD FACS ARIA II

#### Software

BD FACSCanto cell analyzer, FlowJo 10.0.07

#### Cell population abundance

Cell subsets were sorted on a BD FACS Aria II instrument. Post sort samples were analyzed on the same FACS Aria III machine indicating greater than 90% purity for sorted subsets.

#### Gating strategy

- (1) For analysis of Th1, Th2 or Th17 cells in the spleen of mice, cells were gated on lymphocytes in FCS/SSC gate, followed by exclusion of doublets in FSC-A/FSC-H parameter.
- (2) For analysis of protein expression in Th17 cells, cells were gated on lymphocytes in FCS/SSC gate, followed by exclusion of

doublets in FSC-A/FSC-H parameter, followed gating by CD4+ROR $\gamma$ t+.

(3)For sorting CD4+IL17+ Th17 cells in the spleen of IL-17-IRES-EGFP reporter mice, cells were gated on lymphocytes in FCS/SSC gate, followed by exclusion of doublets in FSC-A/FSC-H parameter, followed by gating on CD4+GFP+;

(4)For analysis of polarized Th1,Th2 or Th17 cells, cells were gated on lymphocytes in FCS/SSC gate, followed by exclusion of doublets in FSC-A/FSC-H parameter.

(5)For analysis of ILC3 in the lamina propria lymphocytes, cells were gated on lymphocytes in FCS/SSC gate, followed by exclusion of doublets in FSC-A/FSC-H parameter, followed by gating on CD45+Lin-.

(6)For sorting of Lin-CD45+CD127+ in small intestines and colons, cells were gated on lymphocytes in FCS/SSC gate, followed by exclusion of doublets in FSC-A/FSC-H parameter, followed by gating on Lin-CD45+CD127+.

(7)For analysis of Th17 in the lamina propria lymphocytes, cells were gated on lymphocytes in FCS/SSC gate, followed by exclusion of doublets in FSC-A/FSC-H parameter, followed by gating on Lin+CD45+CD4+.

(8)For analysis of Th17, Th1 or Th2 cells in the spinal cord mononuclear cells of EAE mice, cells were gated on single cells in FCS/SSC gate, followed by exclusion of doublets in FSC-A/FSC-H parameter. And then the living cells were followed by gating on CD45+CD4+.

The boundaries between the positive and negative populations were defined based on isotype stainings.

Tick this box to confirm that a figure exemplifying the gating strategy is provided in the Supplementary Information.

## Magnetic resonance imaging

### Experimental design

Design type

Design specifications

Behavioral performance measures

### Acquisition

Imaging type(s)

Field strength

Sequence & imaging parameters

Area of acquisition

Diffusion MRI  Used  Not used

### Preprocessing

Preprocessing software

Normalization

Normalization template

Noise and artifact removal

Volume censoring

### Statistical modeling & inference

Model type and settings

Effect(s) tested

Specify type of analysis:  Whole brain  ROI-based  Both

Statistic type for inference (See [Eklund et al. 2016](#))

Correction

Describe the type of correction and how it is obtained for multiple comparisons (e.g. FWE, FDR, permutation or Monte Carlo).

Models & analysis

n/a | Involved in the study

- Functional and/or effective connectivity
- Graph analysis
- Multivariate modeling or predictive analysis

Functional and/or effective connectivity

Report the measures of dependence used and the model details (e.g. Pearson correlation, partial correlation, mutual information).

Graph analysis

Report the dependent variable and connectivity measure, specifying weighted graph or binarized graph, subject- or group-level, and the global and/or node summaries used (e.g. clustering coefficient, efficiency, etc.).

Multivariate modeling and predictive analysis

Specify independent variables, features extraction and dimension reduction, model, training and evaluation metrics.
